# Supplementary material for: In vitro activities of eravacycline against clinical bacterial isolates: a multicenter study in Guangdong, China
Source: PubMed Central journal article supplement (PMC11609169; doi:10.3389/fmicb.2024.1504013), 2024-11-18
Supplement: Data_Sheet_1.pdf [file Data_Sheet_1.pdf]

## Supplementary materials

**Table 1 Cumulative percent distribution of eravacycline MIC against Gram-positive and Gram-negative isolates.**

| organism            | N   | Cumulative % of isolates with the following eravacycline MIC(mg/L) |       |       |       |       |       |        |        |        |        |        |
|---------------------|-----|--------------------------------------------------------------------|-------|-------|-------|-------|-------|--------|--------|--------|--------|--------|
|                     |     | 0.015                                                              | 0.03  | 0.06  | 0.12  | 0.25  | 0.5   | 1      | 2      | 4      | 8      | 16     |
| <i>S.aureus</i>     | 126 | 0.00                                                               | 6.35  | 46.03 | 76.98 | 83.33 | 89.68 | 100.00 | 100.00 | 100.00 | 100.00 | 100.00 |
| <i>E. faecalis</i>  | 58  | 6.90                                                               | 12.07 | 56.90 | 94.83 | 94.83 | 98.28 | 100.00 | 100.00 | 100.00 | 100.00 | 100.00 |
| <i>E.faecium</i>    | 29  | 0.00                                                               | 27.59 | 62.07 | 79.31 | 86.21 | 96.55 | 96.55  | 96.55  | 100.00 | 100.00 | 100.00 |
| <i>E.coli</i>       | 187 | 0.53                                                               | 2.14  | 9.09  | 33.69 | 75.40 | 90.37 | 97.86  | 98.93  | 99.47  | 100.00 | 100.00 |
| <i>K.pneumoniae</i> | 136 | 0.00                                                               | 0.00  | 1.47  | 6.62  | 19.85 | 58.09 | 75.74  | 90.44  | 99.26  | 100.00 | 100.00 |
| <i>A.baumannii</i>  | 58  | 0.00                                                               | 1.72  | 29.31 | 41.38 | 51.72 | 70.69 | 87.93  | 93.10  | 100.00 | 100.00 | 100.00 |

N : Numbers

Table 1 shows the distribution of eravacycline MIC for gram-positive and gram-negative isolates. The MIC range of eravacycline were 0.03-1 mg/L for *Staphylococcus aureus*, 0.015-1 mg/L for *Enterococcus faecalis*, 0.03-4 mg/L for *Enterococcus faecium*, 0.015-8 mg/L for *Escherichia coli*, 0.06-8mg/L for *Klebsiella pneumoniae*, and 0.03-4 mg/L for *Acinetobacter baumannii*. The gram-positive bacteria were more susceptible to eravacycline than the gram-negative isolates with MIC<sub>90</sub> values of 0.12–1 mg/L for the Gram-positive isolates and 0.5-2 mg/L for the Gram-negative strains.

**TABLE 2 In vitro the percentage of susceptibility to eravacycline against Gram-positive cocci and Gram-negative bacilli**

| organism                  | N  | MIC <sub>50</sub><br>(mg/L) | MIC <sub>90</sub><br>(mg/L) | MIC<br>Range<br>(mg/L) | Susceptibility %   |                       |
|---------------------------|----|-----------------------------|-----------------------------|------------------------|--------------------|-----------------------|
|                           |    |                             |                             |                        | FDA<br>breakpoints | EUCAST<br>breakpoints |
| MRSA( <i>S. aureus</i> )  | 35 | 0.12                        | 1                           | 0.06-1                 | 45.71              | 68.75                 |
| VRE( <i>E. faecalis</i> ) | 0  | -                           | -                           | -                      | -                  | -                     |

|                             |    |      |      |           |       |       |
|-----------------------------|----|------|------|-----------|-------|-------|
| VRE ( <i>E. faecium</i> )   | 2  | 0.03 | 0.06 | 0.03-0.06 | 100   | 100   |
| CRE( <i>E. coli</i> )       | 17 | 0.25 | 8    | 0.25-8    | 76.47 | 76.47 |
| CRE( <i>K. pneumoniae</i> ) | 35 | 2    | 4    | 0.5-8     | 11.43 | NA    |
| CR( <i>A. baumannii</i> )   | 30 | 1    | 2    | 0.03-4    | NA    | NA    |

N: Numbers

MRSA: Methicillin-resistant *S. aureus*

VRE: Vancomycin-resistant *Enterococcus*

CRE: Carbapenem-resistant *Enterobacteriaceae*

CR: Carbapenem-resistant

To evaluate the ERV against drug-resistant bacteria in vitro, methicillin-resistant *Staphylococcus aureus* (MRSA), vancomycin-resistant *E. faecalis* and *E. faecium*, carbapenem-resistant *E. coli* and *K. pneumoniae*, carbapenem-resistant *A. baumannii* were measured by broth microdilution. Of 45 MRSA, only 45.71% and 68.75% were sensitive to ERV based on the FDA and EUCAST breakpoints, which was lower than the *S. aureus*. However, only limited numbers of the VRE, we couldn't not figure out the susceptibility against the vancomycin-resistant *E. faecalis* and *E. faecium*. Of carbapenem-resistant *E. coli*, 76.47% sensitive to ERV but the carbapenem-resistant *K. pneumoniae*, only 11.43% sensitive to ERV. Of 30 carbapenem-resistant *A. baumannii*, MIC<sub>50</sub> was 1mg/L, which was lower than *A. baumannii*.
